# Supplementary material for: Mesenchymal Stromal Cells Derived Extracellular Vesicles Ameliorate Acute Renal Ischemia Reperfusion Injury by Inhibition of Mitochondrial Fission through miR‐30
Source: Hindawi journal article supplement (doi:10.1155/2016/2093940), 2016-01-01
Supplement: f1 [file 2093940.f1.pdf]

611 Figure.S1

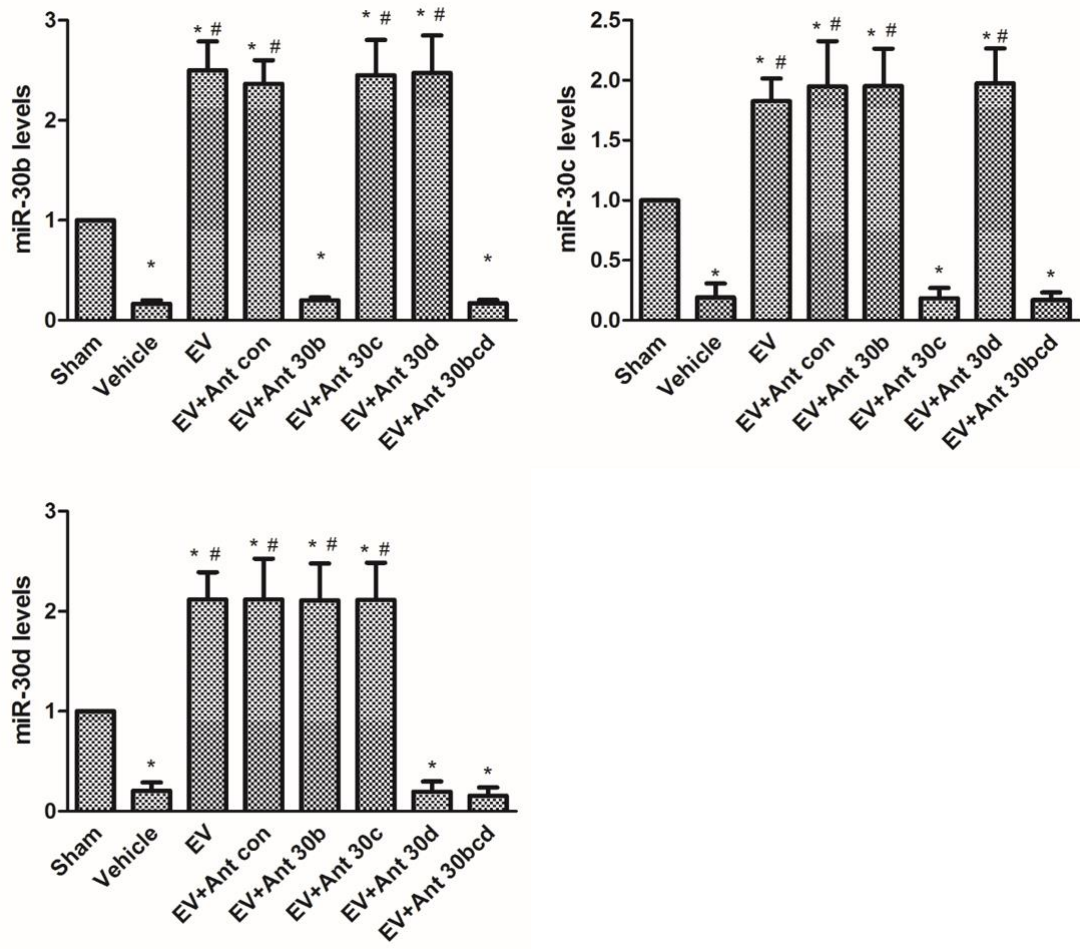

612

613 Figure.S2

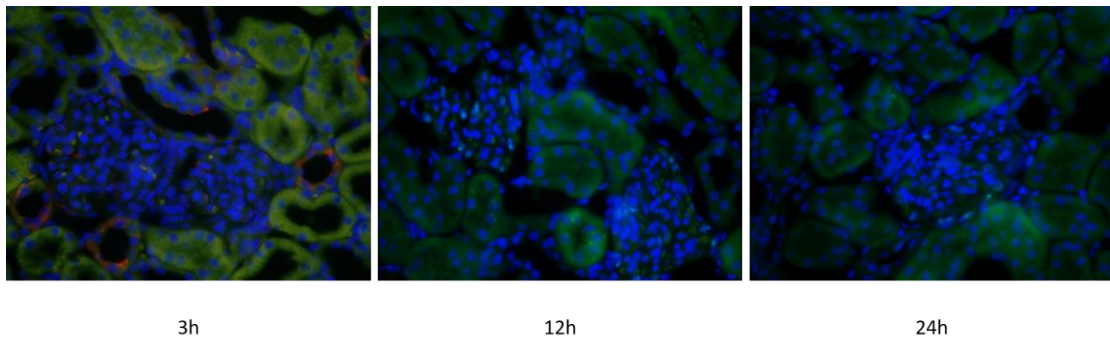

614
